# Supplementary material
Source: publisher figshare collection journal article supplement (https://acs.figshare.com/ndownloader/files/5355946)
Supplement: Supplementary file 1 [file 5355946]

## Supporting Information

### Electrophilic Aromatic Substitution: New Insights into an Old Class of Reactions

*Boris Galabov,<sup>\*,†</sup> Didi Nalbantova,<sup>†</sup> Paul von R. Schleyer,<sup>‡</sup> Henry F. Schaefer III<sup>‡,\*</sup>*

<sup>†</sup>Department of Chemistry and Pharmacy, University of Sofia, Sofia 1164, Bulgaria and <sup>‡</sup>Center for Computational Chemistry, University of Georgia, Athens, Georgia 30602, United States

\*Corresponding authors: Boris Galabov <galabov@chem.uni-sofia.bg>

Henry Schaefer <ccq@uga.edu>

#### Table of Contents

|                                                                                                                                                                                                                                                                                                                                                            |           |
|------------------------------------------------------------------------------------------------------------------------------------------------------------------------------------------------------------------------------------------------------------------------------------------------------------------------------------------------------------|-----------|
| <b>Figure S1.</b> Computed potential energy surface (PES) for anisole-Cl <sub>2</sub> reactions, catalyzed by HCl, in simulated (IEF-PCM) CCl <sub>4</sub> solution at B2-PLYP+D3/6-311+G(2d,2p)//B3LYP/6-311+G(2d,2p). Cis-trans isomerization and elimination transition states, leading to formation of <i>m</i> -substituted product are not included. | <b>S2</b> |
| <b>Figure S2.</b> Addition products formed during anisole chlorination.                                                                                                                                                                                                                                                                                    | <b>S2</b> |
| <b>Figure S3. (A)</b> UV spectra of the reaction mixture for benzene nitration with mixed acid in 1:1 HNO <sub>3</sub> :H <sub>2</sub> SO <sub>4</sub> ) in the 300 – 600 nm region; <b>(B)</b> Spectrum of neat nitrobenzene in the 300 – 600 nm region. All spectra are recorded at 25 °C.                                                               | <b>S3</b> |
| <b>Figure S4.</b> M06-2X/6-311+G(2d,2p) structures of the transition state for the concerted S <sub>E</sub> Ar sulfonation of benzene with two SO <sub>3</sub> molecules in isolation <b>(A)</b> and for the stepwise process <b>(B)</b> in CH <sub>3</sub> NO <sub>2</sub> .                                                                              | <b>S3</b> |
| <b>List of references containing the Cartesian coordinates of all optimized structures discussed in the text.</b>                                                                                                                                                                                                                                          | <b>S3</b> |

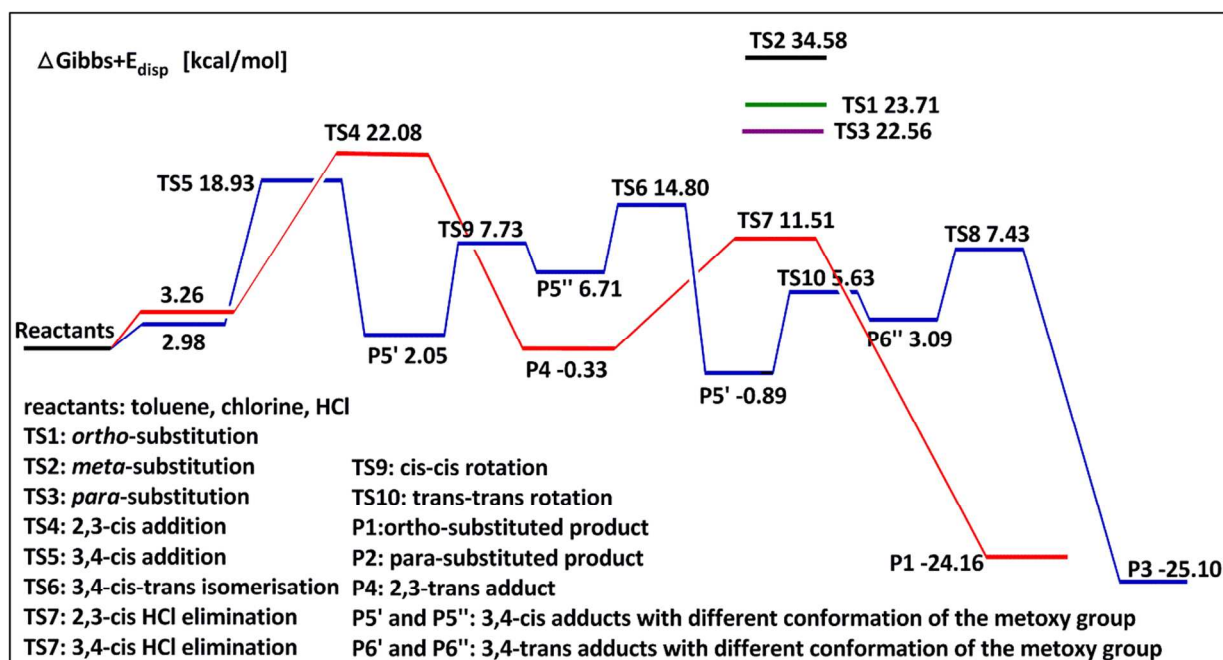

**Figure S1.** Computed potential free energy surface (PES) for anisole-Cl<sub>2</sub> reactions, catalyzed by HCl, in simulated CCl<sub>4</sub> solution at B2-PLYP+D3/6-311+G(2d,2p)//B3LYP/6-311+G(2d,2p). *Cis*-*trans* isomerization and elimination transition states, leading to formation of *m*-substituted product are not included.

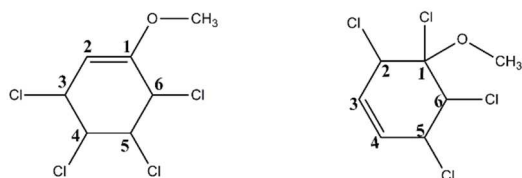

**Figure S2.** Addition products formed during anisole chlorination.

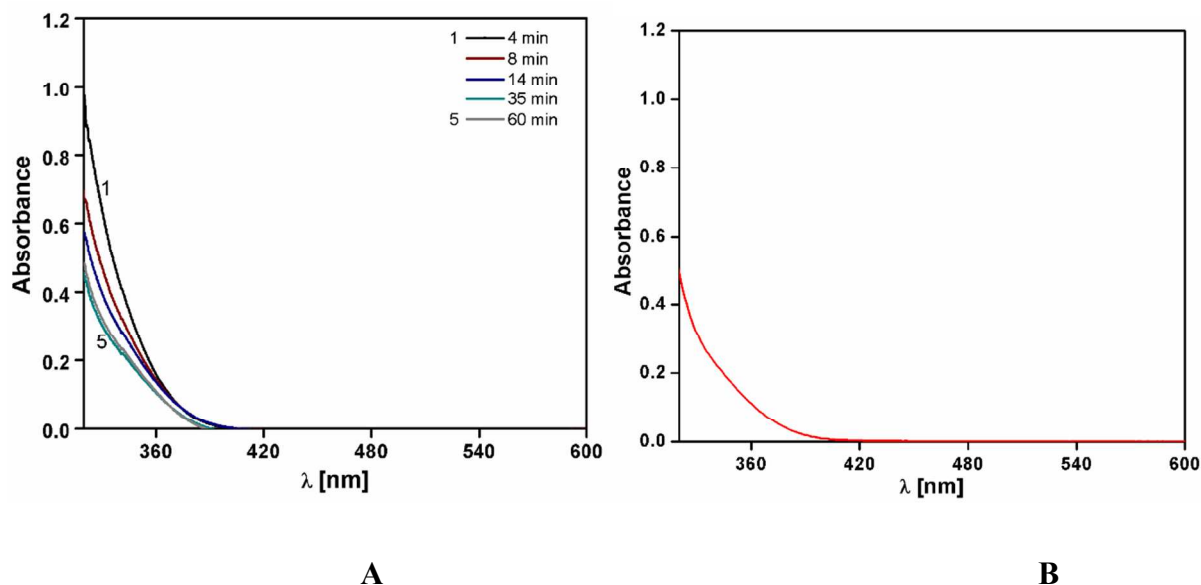

**Figure S3.** (A) UV spectra of the reaction mixture for benzene nitration with mixed acid in 1:1  $\text{HNO}_3:\text{H}_2\text{SO}_4$ ) in the 300 – 600 nm region; (B) Spectrum of neat nitrobenzene in the 300 – 600 nm region. All spectra are recorded at 25 °C.

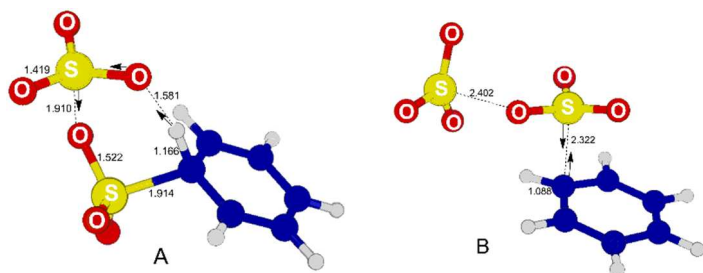

**Figure S4.** M06-2X/6-311+G(2d,2p) structures of the transition state for the concerted  $\text{S}_{\text{E}}\text{Ar}$  sulfonation of benzene with two  $\text{SO}_3$  molecules in isolation (A) and for the stepwise process (B) in  $\text{CH}_3\text{NO}_2$ .

### Cartesian coordinates

The Cartesian coordinates of the optimized structures discussed in the text can be found in the Supporting Information files of the following publications:

Anisole chlorination: SI to Ref. 15.

Toluene chlorination: SI to Ref. 16.

Benzene bromination: SI to Ref. 17.

Benzene nitration: SI to Ref. 18.

Benzene sulfonation: SI to Ref. 19.
